# Supplementary material for: Research productivity of faculty at 30 leading marketing departments
Source: Springer Nature journal article supplement (doi:10.1007/s11002-019-09489-5), 2019-04-27
Supplement: MOESM1 [file 16682908]

**WEB APPENDIX: SUPPLEMENTARY MATERIALS**

**Table S1: List of Faculty Members Included in the Data Set**

(Note: Database includes faculty members at graduate business school Marketing departments of top-30 institutions present in Spring 2017 whose primary affiliation (> 50% full time equivalent) is in Marketing and whose research focus is not [almost] exclusively outside marketing)

| **Name** | **School** | **Included analyses for 2007-2011** | **Included analyses for 2012-2016** | **Included analyses for 2007-2016** | **Classification**  **(Behavioral vs. Quantitative)** |
| --- | --- | --- | --- | --- | --- |
| Blattberg | Carnegie_M | Yes | Yes | Yes | Q |
| Boatwright | Carnegie_M | Yes | Yes | Yes | Q |
| Derdenger | Carnegie_M | No | Yes | No | Q |
| Galak | Carnegie_M | No | Yes | No | B |
| Huang | Carnegie_M | No | Yes | No | Q |
| Montgomery | Carnegie_M | Yes | Yes | Yes | Q |
| Olivola | Carnegie_M | No | Yes | No | B |
| Srinivasan | Carnegie_M | Yes | Yes | Yes | Q |
| Zhang | Carnegie_M | No | No | No | Q |
| Bartels | Chicago | No | Yes | No | B |
| Chintagunta | Chicago | Yes | Yes | Yes | Q |
| Daljord | Chicago | No | No | No | Q |
| Dhar | Chicago | Yes | Yes | Yes | Q |
| Dietvorst | Chicago | No | No | No | B |
| Dube | Chicago | Yes | Yes | Yes | Q |
| Hitsch | Chicago | Yes | Yes | Yes | Q |
| Misra | Chicago | Yes | Yes | Yes | Q |
| Rao | Chicago | No | No | No | Q |
| Shapiro | Chicago | No | No | No | Q |
| Sussman | Chicago | No | No | No | B |
| Urminsky | Chicago | No | Yes | No | B |
| Campbell | Colorado | Yes | Yes | Yes | B |
| De Langhe | Colorado | No | Yes | No | B |
| Fernbach | Colorado | No | Yes | No | B |
| He | Colorado | Yes | Yes | Yes | Q |
| Kornish | Colorado | Yes | Yes | Yes | Q |
| Lichtenstein | Colorado | Yes | Yes | Yes | B |
| Lynch | Colorado | Yes | Yes | Yes | B |
| McGraw | Colorado | Yes | Yes | Yes | B |
| Reinholtz | Colorado | No | No | No | B |
| Sun | Colorado | No | Yes | No | Q |
| Wang | Colorado | No | No | No | Q |
| Williams | Colorado | No | Yes | No | B |
| Ansari | Columbia | Yes | Yes | Yes | Q |
| Ascarza | Columbia | No | Yes | No | Q |
| Bellezza | Columbia | No | No | No | B |
| Capon | Columbia | Yes | Yes | Yes | B |
| Jedidi | Columbia | Yes | Yes | Yes | Q |
| Jerath | Columbia | No | Yes | No | Q |
| Johar | Columbia | Yes | Yes | Yes | B |
| Johnson | Columbia | Yes | Yes | Yes | B |
| Kivetz | Columbia | Yes | Yes | Yes | B |
| Kohli | Columbia | Yes | Yes | Yes | Q |
| Lehmann | Columbia | Yes | Yes | Yes | B |
| Netzer | Columbia | Yes | Yes | Yes | Q |
| Pham | Columbia | Yes | Yes | Yes | B |
| Sarvary | Columbia | Yes | Yes | Yes | Q |
| Schmitt | Columbia | Yes | Yes | Yes | B |
| Shriver | Columbia | No | Yes | No | Q |
| Toubia | Columbia | Yes | Yes | Yes | Q |
| Webb | Columbia | No | No | No | B |
| Wilcox | Columbia | No | Yes | No | B |
| Gupta | Cornell | Yes | Yes | Yes | Q |
| Kadiyali | Cornell | Yes | Yes | Yes | Q |
| Kim | Cornell | No | No | No | B |
| Lee | Cornell | No | No | No | Q |
| Park | Cornell | Yes | Yes | Yes | Q |
| Rao | Cornell | Yes | Yes | Yes | Q |
| Russo | Cornell | Yes | Yes | Yes | B |
| Stayman | Cornell | Yes | Yes | Yes | B |
| Thomas | Cornell | Yes | Yes | Yes | B |
| van Osselaer | Cornell | Yes | Yes | Yes | B |
| Amaldoss | Duke | Yes | Yes | Yes | Q |
| Ariely | Duke | Yes | Yes | Yes | B |
| Bettman | Duke | Yes | Yes | Yes | B |
| Bollinger | Duke | No | Yes | No | Q |
| Boulding | Duke | Yes | Yes | Yes | Q |
| Chartrand | Duke | Yes | Yes | Yes | B |
| Cutright | Duke | No | Yes | No | B |
| Desai | Duke | Yes | Yes | Yes | Q |
| Edell | Duke | Yes | Yes | Yes | B |
| Etkin | Duke | No | No | No | B |
| Fitzsimons | Duke | Yes | Yes | Yes | B |
| Huber | Duke | Yes | Yes | Yes | B |
| Luce | Duke | Yes | Yes | Yes | B |
| Mela | Duke | Yes | Yes | Yes | Q |
| Moorman | Duke | Yes | Yes | Yes | Q |
| Purohit | Duke | Yes | Yes | Yes | Q |
| Staelin | Duke | Yes | Yes | Yes | Q |
| Bhattacharjee | Erasmus | No | No | No | B |
| Boksem | Erasmus | Yes | Yes | Yes | B |
| Chen | Erasmus | No | No | No | Q |
| Ferecatu | Erasmus | No | No | No | Q |
| Genevsky | Erasmus | No | No | No | B |
| Junque de Fortuny | Erasmus | No | No | No | Q |
| Klesse | Erasmus | No | No | No | B |
| Lembregts | Erasmus | No | No | No | B |
| Liberali | Erasmus | Yes | Yes | Yes | Q |
| Paolacci | Erasmus | No | No | No | B |
| Puntoni | Erasmus | Yes | Yes | Yes | B |
| Roos | Erasmus | No | No | No | Q |
| Schley | Erasmus | No | No | No | B |
| Schoonees | Erasmus | No | No | No | Q |
| Smidts | Erasmus | Yes | Yes | Yes | B |
| Sweldens | Erasmus | No | Yes | No | B |
| Szymanowski | Erasmus | No | Yes | No | Q |
| van Bruggen | Erasmus | Yes | Yes | Yes | Q |
| Van den Bergh | Erasmus | No | Yes | No | B |
| van Everdingen | Erasmus | Yes | Yes | Yes | Q |
| Waarts | Erasmus | Yes | Yes | Yes | Q |
| Alba | Florida | Yes | Yes | Yes | B |
| Brenner | Florida | Yes | Yes | Yes | B |
| Cooke | Florida | Yes | Yes | Yes | B |
| Janiszewski | Florida | Yes | Yes | Yes | B |
| Lutz | Florida | Yes | Yes | Yes | B |
| Mitra | Florida | Yes | Yes | Yes | Q |
| Sela | Florida | No | Yes | No | B |
| Shin | Florida | No | Yes | No | Q |
| Shugan | Florida | Yes | Yes | Yes | Q |
| Tu | Florida | No | No | No | B |
| Xie | Florida | Yes | Yes | Yes | Q |
| Yang | Florida | No | No | No | B |
| Bell | Harvard | Yes | Yes | Yes | B |
| Chung | Harvard | No | No | No | Q |
| Deshpande | Harvard | Yes | Yes | Yes | B |
| Dolan | Harvard | Yes | Yes | Yes | Q |
| Elberse | Harvard | Yes | Yes | Yes | Q |
| Gourville | Harvard | Yes | Yes | Yes | B |
| Gupta | Harvard | Yes | Yes | Yes | Q |
| Israeli | Harvard | No | No | No | Q |
| Keenan | Harvard | No | No | No | B |
| Keinan | Harvard | No | Yes | No | B |
| Lal | Harvard | Yes | Yes | Yes | Q |
| Narayandas | Harvard | Yes | Yes | Yes | Q |
| Ngwe | Harvard | No | No | No | Q |
| Norton | Harvard | Yes | Yes | Yes | B |
| Ofek | Harvard | Yes | Yes | Yes | Q |
| Quelch | Harvard | Yes | Yes | Yes | B |
| Rangan | Harvard | Yes | Yes | Yes | Q |
| Santana | Harvard | No | No | No | B |
| Teixeira | Harvard | No | Yes | No | Q |
| Adaval | HKUST | Yes | Yes | Yes | B |
| Ch. Kim | HKUST | No | No | No | B |
| Dalton | HKUST | No | Yes | No | B |
| Helsen | HKUST | Yes | Yes | Yes | Q |
| Hong | HKUST | No | Yes | No | B |
| Huh | HKUST | No | No | No | B |
| J. Kim | HKUST | No | Yes | No | Q |
| Lin | HKUST | No | No | No | Q |
| Mukhopadhyay | HKUST | Yes | Yes | Yes | B |
| Muthukrishnan | HKUST | Yes | Yes | Yes | B |
| Sengupta | HKUST | Yes | Yes | Yes | B |
| van der Lans | HKUST | Yes | Yes | Yes | Q |
| Wang | HKUST | No | No | No | B |
| Zhao | HKUST | Yes | Yes | Yes | Q |
| Zhou | HKUST | Yes | Yes | Yes | B |
| A. Li | Indiana | No | No | No | Q |
| Acito | Indiana | Yes | Yes | Yes | Q |
| Burke | Indiana | Yes | Yes | Yes | Q |
| Che | Indiana | Yes | Yes | Yes | Q |
| Duhachek | Indiana | Yes | Yes | Yes | B |
| Fossen | Indiana | No | No | No | Q |
| Herd | Indiana | No | Yes | No | B |
| Jindal | Indiana | No | No | No | Q |
| K. Li | Indiana | No | No | No | Q |
| Krishnan | Indiana | Yes | Yes | Yes | B |
| Lalwani | Indiana | Yes | Yes | Yes | B |
| MacKenzie | Indiana | Yes | Yes | Yes | B |
| Mallapragada | Indiana | No | Yes | No | Q |
| Morgan | Indiana | Yes | Yes | Yes | Q |
| Rego | Indiana | Yes | Yes | Yes | Q |
| S. Li | Indiana | Yes | Yes | Yes | Q |
| Slotegraaf | Indiana | Yes | Yes | Yes | Q |
| Smith | Indiana | Yes | Yes | Yes | B |
| Walters | Indiana | Yes | Yes | Yes | Q |
| Williams | Indiana | No | Yes | No | B |
| Ferraro | Maryland | Yes | Yes | Yes | B |
| Godes | Maryland | Yes | Yes | Yes | Q |
| J. Zhang | Maryland | Yes | Yes | Yes | Q |
| Joshi | Maryland | No | Yes | No | Q |
| Kannan | Maryland | Yes | Yes | Yes | Q |
| Kirmani | Maryland | Yes | Yes | Yes | B |
| L. Zhang | Maryland | No | No | No | Q |
| Ma | Maryland | No | Yes | No | Q |
| Moe | Maryland | Yes | Yes | Yes | Q |
| Ratner | Maryland | Yes | Yes | Yes | B |
| Rust | Maryland | Yes | Yes | Yes | Q |
| Srivastava | Maryland | Yes | Yes | Yes | B |
| Trusov | Maryland | No | Yes | No | Q |
| Wagner | Maryland | Yes | Yes | Yes | Q |
| Wang | Maryland | No | No | No | B |
| Wedel | Maryland | Yes | Yes | Yes | Q |
| Zhou | Maryland | No | No | No | Q |
| Aribarg | Michigan | Yes | Yes | Yes | Q |
| Bagozzi | Michigan | Yes | Yes | Yes | B |
| Batra | Michigan | Yes | Yes | Yes | B |
| Burson | Michigan | Yes | Yes | Yes | B |
| Feinberg | Michigan | Yes | Yes | Yes | Q |
| Kinnear | Michigan | Yes | Yes | Yes | B |
| Krishna | Michigan | Yes | Yes | Yes | B |
| Manchanda | Michigan | Yes | Yes | Yes | Q |
| Orhun | Michigan | Yes | Yes | Yes | Q |
| Ramaswamy | Michigan | Yes | Yes | Yes | Q |
| Rick | Michigan | No | Yes | No | B |
| Schwartz | Michigan | No | No | No | Q |
| Sriram | Michigan | Yes | Yes | Yes | Q |
| Wooten | Michigan | Yes | Yes | Yes | B |
| Yoon | Michigan | Yes | Yes | Yes | B |
| A. Jing Xu | Minnesota | No | Yes | No | B |
| Ahluwalia | Minnesota | Yes | Yes | Yes | B |
| Bergen | Minnesota | Yes | Yes | Yes | Q |
| Cui | Minnesota | Yes | Yes | Yes | Q |
| D. Roedder John | Minnesota | Yes | Yes | Yes | B |
| G. John | Minnesota | Yes | Yes | Yes | Q |
| Griskevicius | Minnesota | No | Yes | No | B |
| Houston | Minnesota | Yes | Yes | Yes | B |
| L. Xu | Minnesota | No | No | No | Q |
| Loken | Minnesota | Yes | Yes | Yes | B |
| Rao | Minnesota | Yes | Yes | Yes | B |
| Redden | Minnesota | Yes | Yes | Yes | B |
| Vitorino | Minnesota | No | Yes | No | Q |
| Vohs | Minnesota | Yes | Yes | Yes | B |
| Zhu | Minnesota | No | No | No | Q |
| Eckles | MIT | No | No | No | Q |
| Hauser | MIT | Yes | Yes | Yes | Q |
| Ke | MIT | No | No | No | Q |
| Little | MIT | Yes | Yes | Yes | Q |
| Prelec | MIT | Yes | Yes | Yes | B |
| Schmittlein | MIT | Yes | Yes | Yes | Q |
| Simester | MIT | Yes | Yes | Yes | Q |
| Tucker | MIT | Yes | Yes | Yes | Q |
| Urban | MIT | Yes | Yes | Yes | Q |
| Wernerfelt | MIT | Yes | Yes | Yes | Q |
| Zhang | MIT | Yes | Yes | Yes | Q |
| Bockenholt | Northwestern | Yes | Yes | Yes | Q |
| Calder | Northwestern | Yes | Yes | Yes | B |
| Carpenter | Northwestern | Yes | Yes | Yes | Q |
| Cerf | Northwestern | No | Yes | No | B |
| Chernev | Northwestern | Yes | Yes | Yes | B |
| Coughlan | Northwestern | Yes | Yes | Yes | Q |
| Cutler | Northwestern | No | No | No | Q |
| E. Anderson | Northwestern | Yes | Yes | Yes | Q |
| Goldsmith | Northwestern | No | Yes | No | B |
| Gordon | Northwestern | No | Yes | No | Q |
| Grayson | Northwestern | Yes | Yes | Yes | B |
| J. Anderson | Northwestern | Yes | Yes | Yes | Q |
| Kotler | Northwestern | Yes | Yes | Yes | Q |
| Krishnamurthi | Northwestern | Yes | Yes | Yes | Q |
| Labroo | Northwestern | Yes | Yes | Yes | B |
| Lee | Northwestern | Yes | Yes | Yes | B |
| McShane | Northwestern | No | Yes | No | Q |
| Roese | Northwestern | Yes | Yes | Yes | B |
| Rucker | Northwestern | Yes | Yes | Yes | B |
| Sternthal | Northwestern | Yes | Yes | Yes | B |
| Toure-Tillery | Northwestern | No | No | No | B |
| Tuchman | Northwestern | No | No | No | Q |
| Tybout | Northwestern | Yes | Yes | Yes | B |
| Yao | Northwestern | No | Yes | No | Q |
| Zettelmeyer | Northwestern | Yes | Yes | Yes | Q |
| Alter | NYU | No | Yes | No | B |
| Assael | NYU | Yes | Yes | Yes | B |
| Barasch | NYU | No | No | No | B |
| Bonezzi | NYU | No | No | No | B |
| Corfman | NYU | Yes | Yes | Yes | B |
| Craig | NYU | Yes | Yes | Yes | Q |
| Dzyabura | NYU | No | No | No | Q |
| Erdem | NYU | Yes | Yes | Yes | Q |
| Greenleaf | NYU | Yes | Yes | Yes | Q |
| Ishihara | NYU | No | Yes | No | Q |
| Jacoby | NYU | Yes | Yes | Yes | B |
| Jung | NYU | No | No | No | B |
| Kruger | NYU | Yes | Yes | Yes | B |
| Liu | NYU | No | No | No | Q |
| Maheswaran | NYU | Yes | Yes | Yes | B |
| Menon | NYU | Yes | Yes | Yes | B |
| Meyvis | NYU | Yes | Yes | Yes | B |
| Morwitz | NYU | Yes | Yes | Yes | B |
| Raghubir | NYU | Yes | Yes | Yes | B |
| Singh | NYU | Yes | Yes | Yes | Q |
| Steckel | NYU | Yes | Yes | Yes | Q |
| Ursu | NYU | No | No | No | Q |
| Winer | NYU | Yes | Yes | Yes | Q |
| Armstrong | Penn | Yes | Yes | Yes | Q |
| Bell | Penn | Yes | Yes | Yes | Q |
| Berger | Penn | No | Yes | No | B |
| Berman | Penn | No | No | No | Q |
| Bradlow | Penn | Yes | Yes | Yes | Q |
| Eliashberg | Penn | Yes | Yes | Yes | Q |
| Fader | Penn | Yes | Yes | Yes | Q |
| Hutchinson | Penn | Yes | Yes | Yes | B |
| Iyengar | Penn | Yes | Yes | Yes | Q |
| Kahn | Penn | Yes | Yes | Yes | B |
| Meyer | Penn | Yes | Yes | Yes | B |
| Nave | Penn | No | No | No | Q |
| Raju | Penn | Yes | Yes | Yes | Q |
| Reed | Penn | Yes | Yes | Yes | B |
| Reibstein | Penn | Yes | Yes | Yes | Q |
| Robertson | Penn | Yes | Yes | Yes | B |
| Schrift | Penn | No | Yes | No | B |
| Small | Penn | Yes | Yes | Yes | B |
| Van den Bulte | Penn | Yes | Yes | Yes | Q |
| Williams | Penn | Yes | Yes | Yes | B |
| Wind | Penn | Yes | Yes | Yes | Q |
| Yildirim | Penn | No | No | No | Q |
| Zhang | Penn | Yes | Yes | Yes | Q |
| Baumgartner | Penn State | Yes | Yes | Yes | B |
| Bolton | Penn State | Yes | Yes | Yes | B |
| DeSarbo | Penn State | Yes | Yes | Yes | Q |
| Ding | Penn State | Yes | Yes | Yes | Q |
| Fong | Penn State | Yes | Yes | Yes | Q |
| Howell | Penn State | No | No | No | Q |
| Kappe | Penn State | No | Yes | No | Q |
| Kim | Penn State | No | Yes | No | B |
| Liechty | Penn State | Yes | Yes | Yes | Q |
| Lilien | Penn State | Yes | Yes | Yes | Q |
| Meloy | Penn State | Yes | Yes | Yes | B |
| Oliva | Penn State | Yes | Yes | Yes | Q |
| Petersen | Penn State | No | Yes | No | Q |
| Rangaswamy | Penn State | Yes | Yes | Yes | Q |
| Slot | Penn State | No | No | No | Q |
| Winterich | Penn State | No | Yes | No | B |
| Chatterjee | Pittsburgh | Yes | Yes | Yes | Q |
| E. Wu | Pittsburgh | No | Yes | No | B |
| Feick | Pittsburgh | Yes | Yes | Yes | B |
| Geylani | Pittsburgh | Yes | Yes | Yes | Q |
| Inman | Pittsburgh | Yes | Yes | Yes | B |
| Lamberton | Pittsburgh | No | Yes | No | B |
| Liu | Pittsburgh | No | No | No | B |
| Swaminathan | Pittsburgh | Yes | Yes | Yes | B |
| Venkatesh | Pittsburgh | Yes | Yes | Yes | Q |
| Verrochi Coleman | Pittsburgh | No | Yes | No | B |
| Y. Wu | Pittsburgh | No | No | No | Q |
| Aaker | Stanford | Yes | Yes | Yes | B |
| Anderson | Stanford | No | No | No | Q |
| Gardete | Stanford | No | Yes | No | Q |
| Hartmann | Stanford | Yes | Yes | Yes | Q |
| Huang | Stanford | No | No | No | B |
| Lattin | Stanford | Yes | Yes | Yes | Q |
| Levav | Stanford | Yes | Yes | Yes | B |
| Nair | Stanford | Yes | Yes | Yes | Q |
| Narayanan | Stanford | Yes | Yes | Yes | Q |
| Sahni | Stanford | No | No | No | Q |
| Seiler | Stanford | No | Yes | No | Q |
| Shiv | Stanford | Yes | Yes | Yes | B |
| Simonson | Stanford | Yes | Yes | Yes | B |
| Tormala | Stanford | Yes | Yes | Yes | B |
| Wheeler | Stanford | Yes | Yes | Yes | B |
| Bentley | Texas-Austin | No | No | No | Q |
| Broniarczyk | Texas-Austin | Yes | Yes | Yes | B |
| Cunningham | Texas-Austin | Yes | Yes | Yes | Q |
| DeKinder | Texas-Austin | No | Yes | No | Q |
| Duan | Texas-Austin | Yes | Yes | Yes | Q |
| Gershoff | Texas-Austin | Yes | Yes | Yes | B |
| Golden | Texas-Austin | Yes | Yes | Yes | Q |
| Henderson | Texas-Austin | No | Yes | No | Q |
| Hoyer | Texas-Austin | Yes | Yes | Yes | B |
| Irwin | Texas-Austin | Yes | Yes | Yes | B |
| Mahajan | Texas-Austin | Yes | Yes | Yes | Q |
| McAlister | Texas-Austin | Yes | Yes | Yes | Q |
| Peterson | Texas-Austin | Yes | Yes | Yes | B |
| Raghunathan | Texas-Austin | Yes | Yes | Yes | B |
| Rao | Texas-Austin | No | Yes | No | Q |
| Sonnier | Texas-Austin | Yes | Yes | Yes | Q |
| Srinivasan | Texas-Austin | Yes | Yes | Yes | Q |
| Ward | Texas-Austin | No | No | No | B |
| Bosmans | Tilburg | Yes | Yes | Yes | B |
| Bronnenberg | Tilburg | Yes | Yes | Yes | Q |
| Datta | Tilburg | No | No | No | Q |
| Dekimpe | Tilburg | Yes | Yes | Yes | Q |
| Deleersnyder | Tilburg | Yes | Yes | Yes | Q |
| Geyskens | Tilburg | Yes | Yes | Yes | Q |
| Gijsbrechts | Tilburg | Yes | Yes | Yes | Q |
| Klein | Tilburg | No | No | No | Q |
| Knox | Tilburg | Yes | Yes | Yes | Q |
| Lemmens | Tilburg | Yes | Yes | Yes | Q |
| Pieters | Tilburg | Yes | Yes | Yes | B |
| Roest | Tilburg | Yes | Yes | Yes | Q |
| van de Ven | Tilburg | No | Yes | No | B |
| Aggarwal | Toronto | Yes | Yes | Yes | B |
| Borkovsky | Toronto | No | Yes | No | Q |
| Chan | Toronto | No | No | No | B |
| Ching | Toronto | Yes | Yes | Yes | Q |
| Goldfarb | Toronto | Yes | Yes | Yes | Q |
| Hawkins | Toronto | Yes | Yes | Yes | B |
| Hossain | Toronto | Yes | Yes | Yes | Q |
| Landry | Toronto | No | No | No | B |
| Lee | Toronto | No | No | No | B |
| Maglio | Toronto | No | No | No | B |
| Mazar | Toronto | Yes | Yes | Yes | B |
| Mehta | Toronto | Yes | Yes | Yes | Q |
| Moorthy | Toronto | Yes | Yes | Yes | Q |
| Osborne | Toronto | Yes | Yes | Yes | Q |
| Shah | Toronto | No | No | No | B |
| Shi | Toronto | Yes | Yes | Yes | Q |
| Soberman | Toronto | Yes | Yes | Yes | Q |
| Soman | Toronto | Yes | Yes | Yes | B |
| Tsai | Toronto | No | Yes | No | B |
| Webb | Toronto | No | Yes | No | B |
| Chandrashekaran | UBC | Yes | Yes | Yes | Q |
| Cornil | UBC | No | No | No | B |
| Dahl | UBC | Yes | Yes | Yes | B |
| Griffin | UBC | Yes | Yes | Yes | B |
| Hardisty | UBC | No | Yes | No | B |
| Hoegg | UBC | Yes | Yes | Yes | B |
| Park | UBC | No | No | No | Q |
| Qian | UBC | Yes | Yes | Yes | Q |
| Weinberg | UBC | Yes | Yes | Yes | Q |
| White | UBC | Yes | Yes | Yes | B |
| Wu | UBC | No | No | No | Q |
| Zhu | UBC | Yes | Yes | Yes | Q |
| Bodapati | UCLA | Yes | Yes | Yes | Q |
| Bucklin | UCLA | Yes | Yes | Yes | Q |
| Drolet | UCLA | Yes | Yes | Yes | B |
| Hanssens | UCLA | Yes | Yes | Yes | Q |
| Hershfield | UCLA | No | Yes | No | B |
| Hollenbeck | UCLA | No | No | No | Q |
| Honka | UCLA | No | Yes | No | Q |
| Mogilner | UCLA | No | Yes | No | B |
| Rossi | UCLA | Yes | Yes | Yes | Q |
| Shu | UCLA | Yes | Yes | Yes | B |
| Sood | UCLA | Yes | Yes | Yes | B |
| Spiller | UCLA | No | Yes | No | B |
| Zeithammer | UCLA | Yes | Yes | Yes | Q |
| Zhang | UCLA | Yes | Yes | Yes | B |
| Appel | USCalifornia | No | No | No | Q |
| B. Yang | USCalifornia | No | Yes | No | Q |
| Cavanaugh | USCalifornia | No | Yes | No | B |
| Diehl | USCalifornia | Yes | Yes | Yes | B |
| Dukes | USCalifornia | Yes | Yes | Yes | Q |
| Dutta | USCalifornia | Yes | Yes | Yes | Q |
| Folkes | USCalifornia | Yes | Yes | Yes | B |
| Frazier | USCalifornia | Yes | Yes | Yes | Q |
| Hagen | USCalifornia | No | No | No | B |
| Luo | USCalifornia | Yes | Yes | Yes | Q |
| MacInnis | USCalifornia | Yes | Yes | Yes | B |
| Mayzlin | USCalifornia | Yes | Yes | Yes | Q |
| Nunes | USCalifornia | Yes | Yes | Yes | B |
| Park | USCalifornia | Yes | Yes | Yes | B |
| Priester | USCalifornia | Yes | Yes | Yes | B |
| Proserpio | USCalifornia | No | No | No | Q |
| Puranam | USCalifornia | No | No | No | Q |
| S. Yang | USCalifornia | Yes | Yes | Yes | Q |
| Siddarth | USCalifornia | Yes | Yes | Yes | Q |
| Tellis | USCalifornia | Yes | Yes | Yes | Q |
| Tully | USCalifornia | No | No | No | B |
| Ulkumen | USCalifornia | No | Yes | No | B |
| Wei | USCalifornia | No | No | No | Q |
| Weiss | USCalifornia | Yes | Yes | Yes | Q |
| Chan | Wash U StL | Yes | Yes | Yes | Q |
| Cryder | Wash U StL | No | Yes | No | B |
| Gopalakrishnan | Wash U StL | No | No | No | Q |
| Jiang | Wash U StL | No | Yes | No | Q |
| LeBoeuf | Wash U StL | Yes | Yes | Yes | B |
| Narasimhan | Wash U StL | Yes | Yes | Yes | Q |
| Nevskaya | Wash U StL | No | No | No | Q |
| Nowlis | Wash U StL | Yes | Yes | Yes | B |
| Seetharaman | Wash U StL | Yes | Yes | Yes | Q |
| Thomadsen | Wash U StL | Yes | Yes | Yes | Q |
| Arora | Wisconsin | Yes | Yes | Yes | Q |
| Chung | Wisconsin | No | No | No | Q |
| Epp | Wisconsin | No | Yes | No | B |
| Heide | Wisconsin | Yes | Yes | Yes | Q |
| Hoban | Wisconsin | No | No | No | Q |
| Lim | Wisconsin | Yes | Yes | Yes | Q |
| Liu | Wisconsin | Yes | Yes | Yes | Q |
| Mallucci | Wisconsin | No | No | No | Q |
| Moreau | Wisconsin | Yes | Yes | Yes | B |
| O'Guinn | Wisconsin | Yes | Yes | Yes | B |
| Peck | Wisconsin | Yes | Yes | Yes | B |
| Polman | Wisconsin | No | Yes | No | B |
| Tanner | Wisconsin | No | Yes | No | B |
| Thompson | Wisconsin | Yes | Yes | Yes | B |
| Weiss | Wisconsin | No | No | No | B |
| Chance | Yale | No | Yes | No | B |
| Dhar | Yale | Yes | Yes | Yes | B |
| Frederick | Yale | Yes | Yes | Yes | B |
| Kumar | Yale | No | Yes | No | Q |
| Novemsky | Yale | Yes | Yes | Yes | B |
| Ory | Yale | No | No | No | Q |
| Reich | Yale | No | No | No | B |
| Sen | Yale | Yes | Yes | Yes | Q |
| Shin | Yale | Yes | Yes | Yes | Q |
| Sudhir | Yale | Yes | Yes | Yes | Q |
| Uetake | Yale | No | No | No | Q |
| Zauberman | Yale | Yes | Yes | Yes | B |

**Table S2: List of the Journals Included**

| **Marketing Journals** |
| --- |
| Journal of Consumer Research |
| Journal of Marketing |
| Journal of Marketing Research |
| Marketing Science |
|  |
| **Management Science** |
|  |
| **Other UTD List Journals** |
| The Accounting Review |
| Journal of Accounting and Economics |
| Journal of Accounting Research |
| Journal of Finance |
| Journal of Financial Economics |
| The Review of Financial Studies |
| Information Systems Research |
| Journal on Computing |
| MIS Quarterly |
| Operations Research |
| Journal of Operations Management |
| Manufacturing and Service Operations Management |
| Production and Operations Management |
| Academy of Management Journal |
| Academy of Management Review |
| Administrative Science Quarterly |
| Organization Science |
| Journal of International Business Studies |
| Strategic Management Journal |
|  |
| **Non-Business Journals** |
| American Psychologist |
| American Economic Review |
| Annual Review of Psychology |
| Cognition |
| Cognitive Psychology |
| Econometrica |
| JAMA Internal Medicine |
| Journal of Applied Psychology |
| Journal of Experimental Psychology: General |
| Journal of Experimental Psychology: Learning, Memory, and Cognition |
| Journal of Mathematical Psychology |
| Journal of Neuroscience |
| Journal of Personality and Social Psychology |
| Journal of Political Economy |
| Journal of the American Statistical Association |
| Journal of the Royal Statistical Society: Series A |
| Journal of the Royal Statistical Society: Series C |
| Nature |
| Nature Neuroscience |
| Neuron |
| Neuroscience |
| Organizational Behavior and Human Decision Processes |
| Philosophical Transactions of the Royal Society B |
| Proceedings of the National Academy of Sciences |
| Psychological Bulletin |
| Psychological Science |
| Psychometrika |
| Science |
| The Lancet |
| The New England Journal of Medicine |
| The Quarterly Journal of Economics |
| The Rand Journal of Economics |

**Table S3: Number of Marketing Publications including Management Science per Faculty Member by Department**

| 2007-2011 | | | |  | 2012-2016 | | | |  | 2007-2016 | | | | |
| --- | --- | --- | --- | --- | --- | --- | --- | --- | --- | --- | --- | --- | --- | --- |
| University  (Order by median) | N Facultya | Medianb | Meanc |  | University (Order by median) | N  Facultyd | Median | Mean |  | University (Order by median) | N  Facultya | Median | Mean |
| Chicago | 5 | 5.00 | 6.60 |  | Duke | 16 | 3.50 | 3.44 |  | Duke | 14 | 8.00 | 8.36 |
| Yale | 7 | 5.00 | 4.71 |  | Yale | 9 | 3.00 | 3.11 |  | Wash U StL | 6 | 7.50 | 7.33 |
| Wash U StL | 6 | 4.50 | 4.33 |  | Wash U StL | 8 | 3.00 | 2.75 |  | Stanford | 10 | 7.00 | 6.90 |
| Duke | 14 | 4.00 | 4.93 |  | Colorado | 10 | 3.00 | 2.70 |  | Cornell | 8 | 6.50 | 5.63 |
| Pittsburgh | 6 | 4.00 | 4.50 |  | Cornell | 8 | 3.00 | 2.50 |  | Minnesota | 10 | 6.50 | 5.20 |
| Stanford | 10 | 4.00 | 4.30 |  | Stanford | 12 | 2.50 | 2.50 |  | Yale | 7 | 6.00 | 8.43 |
| Columbia | 13 | 4.00 | 4.23 |  | Maryland | 14 | 2.00 | 2.93 |  | Maryland | 11 | 6.00 | 6.64 |
| Penn | 18 | 4.00 | 3.94 |  | Florida | 10 | 2.00 | 2.90 |  | Columbia | 13 | 6.00 | 6.46 |
| Minnesota | 10 | 4.00 | 3.30 |  | Tilburg | 11 | 2.00 | 2.82 |  | Wisconsin | 8 | 6.00 | 5.38 |
| Wisconsin | 8 | 3.50 | 3.38 |  | MIT | 9 | 2.00 | 2.78 |  | Pittsburgh | 6 | 5.50 | 7.00 |
| Florida | 8 | 3.00 | 4.50 |  | Chicago | 7 | 2.00 | 2.57 |  | Chicago | 5 | 5.00 | 9.00 |
| USCalifornia | 15 | 3.00 | 3.80 |  | Columbia | 17 | 2.00 | 2.53 |  | Tilburg | 10 | 5.00 | 7.00 |
| HKUST | 8 | 3.00 | 3.75 |  | Penn State | 14 | 2.00 | 2.36 |  | Penn | 18 | 5.00 | 6.11 |
| Maryland | 11 | 3.00 | 3.64 |  | Minnesota | 13 | 2.00 | 2.00 |  | Florida | 8 | 4.50 | 7.00 |
| UBC | 8 | 3.00 | 3.63 |  | Michigan | 14 | 2.00 | 1.93 |  | Colorado | 6 | 4.50 | 5.17 |
| Cornell | 8 | 3.00 | 3.13 |  | Wisconsin | 11 | 2.00 | 1.91 |  | UBC | 8 | 4.00 | 7.50 |
| Texas-Austin | 13 | 3.00 | 2.69 |  | Toronto | 15 | 2.00 | 1.87 |  | HKUST | 8 | 4.00 | 5.25 |
| Tilburg | 10 | 2.00 | 3.90 |  | UCLA | 13 | 2.00 | 1.85 |  | Michigan | 13 | 4.00 | 5.08 |
| UCLA | 9 | 2.00 | 3.22 |  | Carnegie_M | 8 | 1.50 | 2.00 |  | UCLA | 9 | 4.00 | 4.89 |
| Northwestern | 17 | 2.00 | 3.18 |  | USCalifornia | 18 | 1.50 | 1.72 |  | Northwestern | 17 | 4.00 | 4.82 |
| Michigan | 13 | 2.00 | 3.00 |  | Indiana | 16 | 1.50 | 1.69 |  | Toronto | 12 | 4.00 | 4.42 |
| Colorado | 6 | 2.00 | 2.50 |  | UBC | 9 | 1.00 | 3.44 |  | Texas-Austin | 13 | 4.00 | 4.15 |
| Toronto | 12 | 2.00 | 2.33 |  | Pittsburgh | 9 | 1.00 | 2.89 |  | Penn State | 10 | 4.00 | 4.10 |
| Indiana | 13 | 2.00 | 2.08 |  | Penn | 20 | 1.00 | 2.50 |  | MIT | 9 | 3.00 | 6.67 |
| Carnegie_M | 4 | 1.50 | 3.25 |  | Northwestern | 22 | 1.00 | 1.86 |  | Carnegie_M | 4 | 3.00 | 5.75 |
| Penn State | 10 | 1.50 | 2.20 |  | HKUST | 11 | 1.00 | 1.73 |  | USCalifornia | 15 | 3.00 | 5.53 |
| MIT | 9 | 1.00 | 3.89 |  | NYU | 17 | 1.00 | 1.53 |  | Indiana | 13 | 3.00 | 3.69 |
| NYU | 15 | 1.00 | 1.67 |  | Texas-Austin | 16 | 1.00 | 1.44 |  | NYU | 15 | 2.00 | 3.07 |
| Erasmus | 7 | 1.00 | 1.29 |  | Erasmus | 10 | 1.00 | 1.00 |  | Erasmus | 7 | 1.00 | 2.29 |
| Harvard | 12 | 0.00 | 1.25 |  | Harvard | 14 | 0.00 | .93 |  | Harvard | 12 | 0.00 | 1.75 |
| Total | 305 | 3.00 | 3.34 |  |  | 381 | 2.00 | 2.21 |  |  | 305 | 5.00 | 5.50 |

*Note*. a Only faculty with PhD prior to 2007. b Median number of publications per faculty member. c Mean number of publications per faculty member. d Only faculty with PhD prior to 2012.

**Table S4: All UTD Journal List Publications per Faculty Member by Department**

| 2007-2011 | | | | |  | 2012-2016 | | | |  | 2007-2016 | | | |
| --- | --- | --- | --- | --- | --- | --- | --- | --- | --- | --- | --- | --- | --- | --- |
| University (Order by median) | N Facultya | Medianb | Meanc | |  | University (Order by median) | N Facultyd | Median | Mean |  | University (Order by median) | N Facultya | Median | Mean |
| Chicago | 5 | 5.00 | 6.60 | |  | Duke | 16 | 3.50 | 3.44 |  | Duke | 14 | 8.00 | 8.36 |
| Yale | 7 | 5.00 | 4.71 | |  | Yale | 9 | 3.00 | 3.11 |  | Wash U StL | 6 | 7.50 | 7.50 |
| Pittsburgh | 6 | 4.50 | 4.67 | |  | Wash U StL | 8 | 3.00 | 2.88 |  | Stanford | 10 | 7.00 | 6.90 |
| Wash U StL | 6 | 4.50 | 4.33 | |  | Colorado | 10 | 3.00 | 2.80 |  | Columbia | 13 | 7.00 | 6.77 |
| Duke | 14 | 4.00 | 4.93 | |  | Cornell | 8 | 3.00 | 2.63 |  | Cornell | 8 | 7.00 | 5.75 |
| Columbia | 13 | 4.00 | 4.38 | |  | Maryland | 14 | 2.50 | 3.14 |  | Wisconsin | 8 | 7.00 | 5.63 |
| Stanford | 10 | 4.00 | 4.30 | |  | Stanford | 12 | 2.50 | 2.50 |  | Minnesota | 10 | 6.50 | 5.40 |
| Penn | 18 | 4.00 | 3.94 | |  | Florida | 10 | 2.00 | 3.10 |  | Yale | 7 | 6.00 | 8.43 |
| Minnesota | 10 | 4.00 | 3.40 | |  | Tilburg | 11 | 2.00 | 2.91 |  | Tilburg | 10 | 6.00 | 7.20 |
| Wisconsin | 8 | 3.50 | 3.50 | |  | MIT | 9 | 2.00 | 2.89 |  | Maryland | 11 | 6.00 | 6.82 |
| Florida | 8 | 3.00 | 4.50 | |  | Columbia | 17 | 2.00 | 2.76 |  | Pittsburgh | 6 | 5.50 | 7.17 |
| USCalifornia | 15 | 3.00 | 4.00 | |  | Chicago | 7 | 2.00 | 2.57 |  | Chicago | 5 | 5.00 | 9.00 |
| UBC | 8 | 3.00 | 3.75 | |  | Penn State | 14 | 2.00 | 2.50 |  | Penn | 18 | 5.00 | 6.17 |
| HKUST | 8 | 3.00 | 3.75 | |  | Carnegie_M | 8 | 2.00 | 2.25 |  | Penn State | 10 | 5.00 | 4.90 |
| Maryland | 11 | 3.00 | 3.64 | |  | Wisconsin | 11 | 2.00 | 2.09 |  | Texas-Austin | 13 | 5.00 | 4.31 |
| Cornell | 8 | 3.00 | 3.13 | |  | Minnesota | 13 | 2.00 | 2.08 |  | UBC | 8 | 4.50 | 7.75 |
| Texas-Austin | 13 | 3.00 | 2.69 | |  | Toronto | 15 | 2.00 | 2.07 |  | Florida | 8 | 4.50 | 7.25 |
| Indiana | 13 | 3.00 | 2.38 | |  | Michigan | 14 | 2.00 | 2.00 |  | Colorado | 6 | 4.50 | 5.50 |
| Penn State | 10 | 2.50 | 2.80 | |  | UCLA | 13 | 2.00 | 1.85 |  | Carnegie_M | 4 | 4.00 | 6.25 |
| Colorado | 6 | 2.50 | 2.67 | |  | USCalifornia | 18 | 1.50 | 1.89 |  | USCalifornia | 15 | 4.00 | 5.93 |
| Tilburg | 10 | 2.00 | 4.00 | |  | Indiana | 16 | 1.50 | 1.81 |  | HKUST | 8 | 4.00 | 5.25 |
| Northwestern | 17 | 2.00 | 3.29 | |  | Texas-Austin | 16 | 1.50 | 1.56 |  | Michigan | 13 | 4.00 | 5.23 |
| UCLA | 9 | 2.00 | 3.22 | |  | UBC | 9 | 1.00 | 3.56 |  | Northwestern | 17 | 4.00 | 4.94 |
| Michigan | 13 | 2.00 | 3.08 | |  | Pittsburgh | 9 | 1.00 | 2.89 |  | UCLA | 9 | 4.00 | 4.89 |
| Toronto | 12 | 2.00 | 2.33 | |  | Penn | 20 | 1.00 | 2.55 |  | Toronto | 12 | 4.00 | 4.67 |
| Carnegie_M | 4 | 1.50 | 3.25 | |  | Northwestern | 22 | 1.00 | 1.86 |  | Indiana | 13 | 4.00 | 4.15 |
| Erasmus | 7 | 1.00 | 1.43 | |  | HKUST | 11 | 1.00 | 1.73 |  | MIT | 9 | 3.00 | 6.78 |
| MIT | 9 | 1.00 | 3.89 | |  | NYU | 17 | 1.00 | 1.53 |  | NYU | 15 | 2.00 | 3.07 |
| NYU | 15 | 1.00 | 1.67 | |  | Erasmus | 10 | 1.00 | 1.00 |  | Erasmus | 7 | 2.00 | 2.43 |
| Harvard | 12 | 0.00 | 1.33 | |  | Harvard | 14 | 0.00 | 1.07 |  | Harvard | 12 | 0.00 | 2.00 |
|  |  |  | |  |  |  |  |  |  |  |  |  |  |  |
| Total | 305 | 3.00 | | 3.43 |  |  | 381 | 2.00 | 2.30 |  |  | 305 | 5.00 | 5.70 |

*Note*. a Only faculty with PhD prior to 2007. b Median number of publications per faculty member. c Mean number of publications per faculty member. d Only faculty with PhD prior to 2012.

| 2007-2011 | | | | |  | 2012-2016 | | | | |  | 2007-2016 | | | |
| --- | --- | --- | --- | --- | --- | --- | --- | --- | --- | --- | --- | --- | --- | --- | --- |
| University  (Order by Median) | N Facultya | Medianb | Meanc | |  | University (Order by median) | N Facultyd | Median | | Mean |  | University (Order by median) | N Facultya | Median | Mean |
| Chicago | 5 | 6.00 | 7.60 | |  | Duke | 16 | 4.50 | | 4.69 |  | Duke | 14 | 9.50 | 11.36 |
| Duke | 14 | 5.50 | 6.57 | |  | Yale | 9 | 4.00 | | 3.89 |  | Stanford | 10 | 9.50 | 9.30 |
| Stanford | 10 | 5.50 | 6.00 | |  | Penn State | 14 | 3.50 | | 3.64 |  | Yale | 7 | 8.00 | 10.00 |
| Yale | 7 | 5.00 | 5.43 | |  | Colorado | 10 | 3.50 | | 3.40 |  | Wash U StL | 6 | 8.00 | 8.33 |
| Columbia | 13 | 5.00 | 5.31 | |  | Wash U StL | 8 | 3.50 | | 3.13 |  | Columbia | 13 | 8.00 | 8.15 |
| Wash U StL | 6 | 5.00 | 5.00 | |  | Minnesota | 13 | 3.00 | | 4.46 |  | Minnesota | 10 | 7.00 | 8.20 |
| Pittsburgh | 6 | 4.50 | 4.67 | |  | UBC | 9 | 3.00 | | 4.00 |  | MIT | 9 | 7.00 | 7.78 |
| Minnesota | 10 | 4.00 | 4.60 | |  | Chicago | 7 | 3.00 | | 4.00 |  | Maryland | 11 | 7.00 | 7.09 |
| MIT | 9 | 4.00 | 4.44 | |  | MIT | 9 | 3.00 | | 3.33 |  | Cornell | 8 | 7.00 | 6.63 |
| Penn | 18 | 4.00 | 4.28 | |  | Columbia | 17 | 3.00 | | 3.18 |  | Wisconsin | 8 | 7.00 | 5.63 |
| UBC | 8 | 3.50 | 4.50 | |  | Stanford | 12 | 3.00 | | 3.17 |  | UBC | 8 | 6.50 | 9.00 |
| HKUST | 8 | 3.50 | 3.88 | |  | Cornell | 8 | 3.00 | | 2.88 |  | Penn State | 10 | 6.50 | 6.90 |
| Wisconsin | 8 | 3.50 | 3.50 | |  | Maryland | 14 | 2.50 | | 3.21 |  | Chicago | 5 | 6.00 | 10.60 |
| Florida | 8 | 3.00 | 4.75 | |  | Florida | 10 | 2.50 | | 3.20 |  | Tilburg | 10 | 6.00 | 8.10 |
| Northwestern | 17 | 3.00 | 4.24 | |  | Carnegie_M | 8 | 2.50 | | 3.00 |  | Colorado | 6 | 6.00 | 7.00 |
| USCalifornia | 15 | 3.00 | 4.20 | |  | Penn | 20 | 2.50 | | 2.90 |  | Penn | 18 | 6.00 | 6.78 |
| Colorado | 6 | 3.00 | 3.83 | |  | Indiana | 16 | 2.50 | | 2.13 |  | Pittsburgh | 6 | 5.50 | 7.17 |
| Maryland | 11 | 3.00 | 3.82 | |  | Tilburg | 11 | 2.00 | | 3.45 |  | Florida | 8 | 5.00 | 7.63 |
| Cornell | 8 | 3.00 | 3.75 | |  | UCLA | 13 | 2.00 | | 2.77 |  | Northwestern | 17 | 5.00 | 6.24 |
| Penn State | 10 | 3.00 | 3.50 | |  | Wisconsin | 11 | 2.00 | | 2.64 |  | Toronto | 12 | 5.00 | 5.92 |
| UCLA | 9 | 3.00 | 3.44 | |  | Toronto | 15 | 2.00 | | 2.53 |  | Michigan | 13 | 5.00 | 5.77 |
| Texas-Austin | 13 | 3.00 | 2.69 | |  | Michigan | 14 | 2.00 | | 2.36 |  | UCLA | 9 | 5.00 | 5.22 |
| Indiana | 13 | 3.00 | 2.62 | |  | Northwestern | 22 | 2.00 | | 2.18 |  | Indiana | 13 | 5.00 | 4.62 |
| Toronto | 12 | 2.50 | 3.00 | |  | NYU | 17 | 2.00 | | 2.12 |  | Texas-Austin | 13 | 5.00 | 4.46 |
| Tilburg | 10 | 2.00 | 4.40 | |  | USCalifornia | 18 | 2.00 | | 2.11 |  | HKUST | 8 | 4.50 | 5.63 |
| Michigan | 13 | 2.00 | 3.31 | |  | Erasmus | 10 | 2.00 | | 2.10 |  | USCalifornia | 15 | 4.00 | 6.27 |
| NYU | 15 | 2.00 | 2.13 | |  | Texas-Austin | 16 | 1.50 | | 1.69 |  | Carnegie_M | 4 | 4.00 | 6.25 |
| Carnegie_M | 4 | 1.50 | 3.25 | |  | Pittsburgh | 9 | 1.00 | | 2.89 |  | NYU | 15 | 3.00 | 3.93 |
| Erasmus | 7 | 1.00 | 1.71 | |  | HKUST | 11 | 1.00 | | 1.91 |  | Erasmus | 7 | 2.00 | 3.29 |
| Harvard | 12 | 0.00 | 2.33 | |  | Harvard | 14 | 0.00 | | 2.43 |  | Harvard | 12 | 0.50 | 4.58 |
|  |  |  | |  |  |  |  |  |  | |  |  |  |  |  |
| Total | 305 | 3.00 | | 4.01 |  |  | 381 | 2.00 | 2.90 | |  |  | 305 | 6.00 | 6.78 |

**Table S5: All A-level Publications per Faculty Member by Department**

*Note*. a Only faculty with PhD prior to 2007. b Median number of publications per faculty member. c Mean number of publications per faculty member. d Only faculty with PhD prior to 2012.

**Table S6: Number of Publication among Top 30 US versus Non-US Universities and Other US versus Non-US Universities (UTD database)**

|  | US Schools in Top 30 | Non-US Schools in Top 30 | Other-US | Other-Non-US |
| --- | --- | --- | --- | --- |
| 2007-2011 | 1055 | 182 | 886 | 611 |
| 2012-2016 | 772 | 148 | 868 | 681 |

**Table S7: Correlations between Years since PhD and Number of Publications per Faculty Member (2007-2016)**

|  | 1 | 2 | 3 | 4 | 5 |
| --- | --- | --- | --- | --- | --- |
| 1. Years since PhD | 1.00 |  |  |  |  |
| 2. Marketing Publications | -.265** | 1.00 |  |  |  |
| 3. Marketing Publications including Management Science | -.286** | .972** | 1.00 |  |  |
| 4. All UTD Publications | -.276** | .964** | .994** | 1.00 |  |
| 5. All A-level Publications | -.296** | .844** | .867** | .871** | 1.00 |

*Note*. ** *p* < .01; * *p* < .05. N = 305; only includes faculty with PhD prior to 2007.

**Table S8: Regression Analysis Results Productivity in Marketing Journals (JCR, JMR, MKS, JM) in 2012-2016**

| Variables | Unstandardized Coefficients | | Standardized Coefficients | t | Sig. |
| --- | --- | --- | --- | --- | --- |
| B | Std. Error | Beta |
| Intercept | .749 | .279 |  | 2.684 | .008 |
| MKTA0711* | .477 | .036 | .609 | 13.138 | .000 |
| Years since PHD | -.011 | .009 | -.061 | -1.321 | .187 |

*Note*. N = 305; only includes faculty with PhD prior to 2007. *Number of publications in JCR, JMR, MKS, and JM in 2007-2011.

**Table S9: Marketing Publications per Faculty Member by Quantitative vs. Behavioral Faculty (Inferred by Publication Outlets)**

|  | | | Publications in Five Journals  (JCR, JMR, JM, MKS, MgtSci) | |
| --- | --- | --- | --- | --- |
|  | Mean | | | Median |
| Those who had at least one publication in JCR from 2007 to 2016 | | | | |
| 2007-2011 (N = 115a) | 4.25 | | | 4.00 |
| 2012-2016 (N = 152b) | 2.78 | | | 2.00 |
|  | | | | |
| Those who had at least one publication in JM from 2007 to 2016 | | | | |
| 2007-2011 (N = 85a) | 4.74 | | | 4.00 |
| 2012-2016 (N = 98b) | 3.00 | | | 2.00 |
|  | | | | |
| Those who had at least one publication in MKS from 2007 to 2016 | | | | |
| 2007-2011 (N = 145a) | 4.61 | | | 4.00 |
| 2012-2016 (N = 173b) | 2.92 | | | 3.00 |
|  |  | | |  |
|  |  | | |  |
| Those who had more publications in JCR than in JM and MKS combined | | | | |
| 2007-2011 (N = 90a) | | 3.76 | | 3.00 |
| 2012-2016 (N = 124b) | | 2.77 | | 2.00 |
|  | |  | |  |
| Those who had more publications in JM than in JCR and MKS combined | | | | |
| 2007-2011 (N = 28a) | | 2.71 | | 2.00 |
| 2012-2016 (N = 30b) | | 2.23 | | 2.00 |
|  | |  | |  |
| Those who had more publications in MKS than JM and JCR combined | | | | |
| 2007-2011 (N = 110a) | | 4.55 | | 4.00 |
| 2012-2016 (N = 131b) | | 2.66 | | 2.00 |

*Note*. a Only faculty with PhD prior to 2007. b Only faculty with PhD prior to 2012.

**Table S10: Productivity Changes at Top 30 Business Schools (Business General)**

| All Business Fields | | N Publicationsa | | |
| --- | --- | --- | --- | --- |
| UTD rank | University | 2007-2011 | 2012-2016 | Change |
| 1 | University of Pennsylvania (The Wharton School) | 350 | 306 | -13% |
| 2 | Harvard University (Harvard Business School) | 216 | 245 | 13% |
| 3 | New York University (NYU) (Leonard N Stern School of Business) | 252 | 249 | -1% |
| 4 | University of Michigan at Ann Arbor (Ross School of Business) | 237 | 211 | -11% |
| 5 | University of Chicago (Booth School of Business) | 220 | 182 | -17% |
| 6 | Duke University (The Fuqua School of Business) | 241 | 189 | -22% |
| 7 | Massachusetts Institute of Technology (Sloan School of Management) | 193 | 225 | 17% |
| 8 | Columbia University (Columbia Business School) | 225 | 217 | -4% |
| 9 | Stanford University (Graduate School of Business) | 208 | 180 | -13% |
| 10 | INSEAD (School of Business) | 199 | 209 | 5% |
| 11 | University of Texas at Austin (McCombs School of Business) | 227 | 205 | -10% |
| 12 | University of Southern California (Marshall School of Business) | 180 | 193 | 7% |
| 13 | University of Maryland at College Park (Robert H. Smith School of Business) | 214 | 192 | -10% |
| 14 | Northwestern University (Kellogg School of Management) | 195 | 176 | -10% |
| 15 | University of Texas at Dallas (Naveen Jindal School of Management) | 152 | 216 | 42% |
| 16 | University of Minnesota at Twin Cities (Carlson School of Management) | 156 | 204 | 31% |
| 17 | University of Toronto (Joseph L. Rotman School of Management) | 125 | 192 | 54% |
| 18 | Pennsylvania State University at University Park (Smeal College of Business) | 160 | 162 | 1% |
| 19 | University of North Carolina at Chapel Hill (Kenan-Flagler Business School) | 130 | 188 | 45% |
| 20 | Hong Kong University of Science and Technology (Business School) | 146 | 142 | -3% |
| 21 | Ohio State University (Fisher College of Business) | 134 | 176 | 31% |
| 22 | University of London (London Business School) | 141 | 147 | 4% |
| 23 | University of California at Los Angeles (Anderson School of Management) | 154 | 122 | -21% |
| 24 | Arizona State University (W.P. Carey School of Business) | 127 | 160 | 26% |
| 25 | Washington University at St. Louis (Olin School of Business) | 112 | 138 | 23% |
| 26 | University of Illinois at Urbana-Champaign (Gies College of Business) | 126 | 132 | 5% |
| 27 | Indiana University at Bloomington (Kelley School of Business) | 123 | 147 | 20% |
| 28 | University of California at Berkeley (Walter A. Haas School of Business) | 125 | 117 | -6% |
| 29 | University of Washington at Seattle (Michael G. Foster School of Business) | 117 | 158 | 35% |
| 30 | University of British Columbia (Sauder School of Business) | 129 | 113 | -12% |
| Total | | 5314 | 5493 | 3% |

*Note*. aAll UT Dallas journals

**Table S11: Productivity Changes at Top 30 Business Schools (Accounting)**

| Accounting | | N Publicationsa | | |
| --- | --- | --- | --- | --- |
| UTD rank | University | 2007-2011 | 2012-2016 | Change |
| 1 | University of Chicago (Booth School of Business) | 51 | 32 | -37% |
| 2 | University of Pennsylvania (The Wharton School) | 40 | 29 | -28% |
| 3 | University of Texas at Austin (McCombs School of Business) | 35 | 32 | -9% |
| 4 | University of Southern California (Marshall School of Business) | 28 | 27 | -4% |
| 5 | Stanford University (Graduate School of Business) | 30 | 35 | 17% |
| 6 | Massachusetts Institute of Technology (Sloan School of Management) | 30 | 25 | -17% |
| 7 | Harvard University (Harvard Business School) | 21 | 22 | 5% |
| 8 | University of Michigan at Ann Arbor (Ross School of Business) | 27 | 25 | -7% |
| 9 | University of Illinois at Urbana-Champaign (Gies College of Business) | 16 | 35 | 119% |
| 10 | Ohio State University (Fisher College of Business) | 21 | 23 | 10% |
| 11 | University of North Carolina at Chapel Hill (Kenan-Flagler Business School) | 15 | 21 | 40% |
| 12 | University of Texas at Dallas (Naveen Jindal School of Management) | 19 | 27 | 42% |
| 13 | Indiana University at Bloomington (Kelley School of Business) | 16 | 21 | 31% |
| 14 | New York University (NYU) (Leonard N Stern School of Business) | 13 | 22 | 69% |
| 15 | University of Pittsburgh (The Joseph M. Katz Graduate School of Business) | 17 | 18 | 6% |
| 16 | Hong Kong University of Science and Technology (Business School) | 17 | 21 | 24% |
| 17 | Pennsylvania State University at University Park (Smeal College of Business) | 20 | 12 | -40% |
| 18 | University of California at Berkeley (Walter A. Haas School of Business) | 9 | 17 | 89% |
| 19 | Emory University (Goizueta Business School) | 16 | 20 | 25% |
| 20 | University of Georgia (Terry College of Business) | 13 | 19 | 46% |
| 21 | Duke University (The Fuqua School of Business) | 15 | 16 | 7% |
| 22 | Northwestern University (Kellogg School of Management) | 18 | 13 | -28% |
| 23 | University of Washington at Seattle (Michael G. Foster School of Business) | 19 | 19 | 0% |
| 24 | University of Toronto (Joseph L. Rotman School of Management) | 14 | 22 | 57% |
| 25 | Boston College (Carroll School of Management) | 5 | 19 | 280% |
| 26 | Washington University at St. Louis (Olin School of Business) | 5 | 19 | 280% |
| 27 | Nanyang Technological University (Nanyang Business School) | 13 | 21 | 62% |
| 28 | Cornell University (Samuel Curtis Johnson Graduate School of Management) | 9 | 18 | 100% |
| 29 | University of Florida (Warrington College of Business) | 6 | 21 | 250% |
| 30 | University of Arizona (Eller College of Management) | 17 | 20 | 18% |
| Total | | 575 | 671 | 17% |

*Note*. a The Accounting Review, Journal of Accounting and Economics, Journal of Accounting Research

**Table S12: Productivity Changes at Top 30 Business Schools (Finance)**

| Finance | | N Publicationsa | | |
| --- | --- | --- | --- | --- |
| UTD rank | University | 2007-2011 | 2012-2016 | Change |
| 1 | University of Chicago (Booth School of Business) | 76 | 83 | 9% |
| 2 | New York University (NYU) (Leonard N Stern School of Business) | 84 | 77 | -8% |
| 3 | Harvard University   (Harvard Business School) | 69 | 66 | -4% |
| 4 | University of Pennsylvania (The Wharton School) | 68 | 69 | 1% |
| 5 | Columbia University (Columbia Business School) | 71 | 54 | -24% |
| 6 | Duke University (The Fuqua School of Business) | 52 | 40 | -23% |
| 7 | Stanford University (Graduate School of Business) | 46 | 36 | -22% |
| 8 | Massachusetts Institute of Technology (Sloan School of Management) | 43 | 53 | 23% |
| 9 | University of Michigan at Ann Arbor (Ross School of Business) | 54 | 29 | -46% |
| 10 | University of California at Los Angeles (Anderson School of Management) | 48 | 34 | -29% |
| 11 | University of North Carolina at Chapel Hill (Kenan-Flagler Business School) | 35 | 46 | 31% |
| 12 | University of Texas at Austin (McCombs School of Business) | 46 | 43 | -7% |
| 13 | University of California at Berkeley (Walter A. Haas School of Business) | 43 | 40 | -7% |
| 14 | University of London (London Business School) | 43 | 49 | 14% |
| 15 | Northwestern University (Kellogg School of Management) | 38 | 42 | 11% |
| 16 | Ohio State University (Fisher College of Business) | 45 | 46 | 2% |
| 17 | University of Southern California (Marshall School of Business) | 27 | 39 | 44% |
| 18 | University of Maryland at College Park (Robert H. Smith School of Business) | 33 | 31 | -6% |
| 19 | University of Washington at Seattle (Michael G. Foster School of Business) | 29 | 42 | 45% |
| 20 | Boston College (Carroll School of Management) | 34 | 31 | -9% |
| 21 | Washington University at St. Louis (Olin School of Business) | 37 | 23 | -38% |
| 22 | Yale University (School of Management) | 29 | 27 | -7% |
| 23 | University of Illinois at Urbana-Champaign (Gies College of Business) | 26 | 26 | 0% |
| 24 | Indiana University at Bloomington (Kelley School of Business) | 24 | 29 | 21% |
| 25 | Hong Kong University of Science and Technology (Business School) | 29 | 19 | -34% |
| 26 | Cornell University (Samuel Curtis Johnson Graduate School of Management) | 36 | 23 | -36% |
| 27 | University of Toronto (Joseph L. Rotman School of Management) | 21 | 31 | 48% |
| 28 | University of Notre Dame (Mendoza College of Business) | 14 | 23 | 64% |
| 29 | INSEAD (School of Business) | 24 | 22 | -8% |
| 30 | Arizona State University (W.P. Carey School of Business) | 21 | 26 | 24% |
| Total | | 1245 | 1199 | -4% |

*Note*. aJournal of Finance, Journal of Financial Economics, The Review of Financial Studies

**Table S13: Productivity Changes at Top 30 Business Schools (OTIM)**

| Operations, Technology, and Information Management | | N Publicationsa | | |
| --- | --- | --- | --- | --- |
| UTD rank | University | 2007-2011 | 2012-2016 | Change |
| 1 | University of Texas at Dallas (Naveen Jindal School of Management) | 63 | 92 | 46% |
| 2 | Massachusetts Institute of Technology (Sloan School of Management) | 49 | 63 | 29% |
| 3 | University of Maryland at College Park (Robert H. Smith School of Business) | 61 | 54 | -11% |
| 4 | Carnegie Mellon University (Tepper School of Business) | 49 | 45 | -8% |
| 5 | New York University (NYU) (Leonard N Stern School of Business) | 47 | 42 | -11% |
| 6 | Columbia University (Columbia Business School) | 52 | 34 | -35% |
| 7 | City University of Hong Kong (College of Business) | 24 | 79 | 229% |
| 8 | Georgia Institute of Technology (Scheller College of Business) | 36 | 56 | 56% |
| 9 | University of British Columbia (Sauder School of Business) | 43 | 42 | -2% |
| 10 | University of Texas at Austin (McCombs School of Business) | 40 | 50 | 25% |
| 11 | University of Minnesota at Twin Cities (Carlson School of Management) | 38 | 57 | 50% |
| 12 | Duke University (The Fuqua School of Business) | 42 | 26 | -38% |
| 13 | University of North Carolina at Chapel Hill (Kenan-Flagler Business School) | 26 | 42 | 62% |
| 14 | Stanford University (Graduate School of Business) | 38 | 29 | -24% |
| 15 | Arizona State University (W.P. Carey School of Business) | 28 | 43 | 54% |
| 16 | INSEAD (School of Business) | 31 | 43 | 39% |
| 17 | University of Southern California (Marshall School of Business) | 28 | 36 | 29% |
| 18 | University of Michigan at Ann Arbor (Ross School of Business) | 32 | 38 | 19% |
| 19 | Pennsylvania State University at University Park (Smeal College of Business) | 23 | 41 | 78% |
| 20 | Ohio State University (Fisher College of Business) | 20 | 39 | 95% |
| 21 | University of Pennsylvania (The Wharton School) | 35 | 25 | -29% |
| 22 | Indiana University at Bloomington (Kelley School of Business) | 26 | 37 | 42% |
| 23 | Michigan State University (The Eli Broad College of Business) | 36 | 31 | -14% |
| 24 | Northwestern University (Kellogg School of Management) | 30 | 26 | -13% |
| 25 | University of California at Los Angeles (Anderson School of Management) | 24 | 38 | 58% |
| 26 | Hong Kong Polytechnic University (Faculty of Business) | 19 | 38 | 100% |
| 27 | University of Arkansas at Fayetteville (Sam M. Walton College of Business) | 19 | 37 | 95% |
| 28 | University of Connecticut (School of Business) | 30 | 27 | -10% |
| 29 | Georgia State University (J. Mack Robinson School of Business) | 15 | 44 | 193% |
| 30 | Purdue University (Krannert Graduate School of Management) | 18 | 35 | 94% |
| Total | | 1022 | 1289 | 26% |

*Note*. aInformation Systems Research, Journal of Computing, MIS Quarterly, Operations Research, Journal of Operations Management, Manufacturing and Service Operations Management, Production and Operations Management.

**Table S14: Productivity Changes at Top 30 Business Schools (Management)**

| Management | | N Publicationsa | | |
| --- | --- | --- | --- | --- |
| UTD rank | University | 2007-2011 | 2012-2016 | Change |
| 1 | University of Pennsylvania (The Wharton School) | 68 | 85 | 25% |
| 2 | INSEAD (School of Business) | 67 | 87 | 30% |
| 3 | Harvard University (Harvard Business School) | 57 | 71 | 25% |
| 4 | University of Michigan at Ann Arbor (Ross School of Business) | 55 | 55 | 0% |
| 5 | University of Minnesota at Twin Cities (Carlson School of Management) | 32 | 59 | 84% |
| 6 | Pennsylvania State University at University Park (Smeal College of Business) | 45 | 51 | 13% |
| 7 | University of London (London Business School) | 35 | 45 | 29% |
| 8 | Arizona State University (W.P. Carey School of Business) | 43 | 54 | 26% |
| 9 | University of Maryland at College Park (Robert H. Smith School of Business) | 44 | 41 | -7% |
| 10 | University of Toronto (Joseph L. Rotman School of Management) | 28 | 48 | 71% |
| 11 | New York University (NYU) (Leonard N Stern School of Business) | 32 | 35 | 9% |
| 12 | University of Texas at Austin (McCombs School of Business) | 41 | 34 | -17% |
| 13 | University of Southern California (Marshall School of Business) | 29 | 35 | 21% |
| 14 | University of Illinois at Urbana-Champaign (Gies College of Business) | 38 | 28 | -26% |
| 15 | Michigan State University (The Eli Broad College of Business) | 36 | 36 | 0% |
| 16 | Texas A&M University at College Station (Mays Business School) | 43 | 38 | -12% |
| 17 | Western University (Canada) / University of Western at London, Ontario (Ivey Business School) | 30 | 28 | -7% |
| 18 | Erasmus University (Rotterdam School of Management) | 29 | 33 | 14% |
| 19 | Massachusetts Institute of Technology (Sloan School of Management) | 20 | 28 | 40% |
| 20 | Bocconi University / Universita Bocconi (SDA School of Management (Inc. Finance, Marketing, Technology)) | 16 | 51 | 219% |
| 21 | University of South Carolina at Columbia (Darla Moore School of Business) | 27 | 30 | 11% |
| 22 | National University of Singapore (NUS Business School) | 24 | 40 | 67% |
| 23 | Duke University (The Fuqua School of Business) | 23 | 33 | 43% |
| 24 | Northwestern University (Kellogg School of Management) | 27 | 25 | -7% |
| 25 | University of Washington at Seattle (Michael G. Foster School of Business) | 19 | 37 | 95% |
| 26 | Copenhagen Business School (School of Business) | 25 | 33 | 32% |
| 27 | Stanford University (Graduate School of Business) | 23 | 25 | 9% |
| 28 | Hong Kong University of Science and Technology (Business School) | 27 | 24 | -11% |
| 29 | Washington University at St. Louis (Olin School of Business) | 17 | 29 | 71% |
| 30 | University of North Carolina at Chapel Hill (Kenan-Flagler Business School) | 19 | 32 | 68% |
| Total | | 1019 | 1250 | 23% |

*Note*. aAcademy of Management Journal, Academy of Management Review, Administrative Science Quarterly, Organization Science, Journal of International Business Studies, Strategic Management Journal.

**Figure S1: 2007-2016 Marketing Publication by PhD Year**


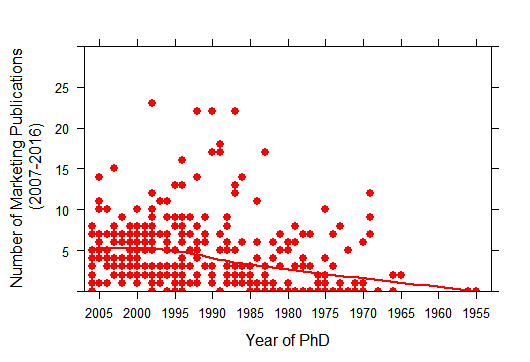


*Note*. Only includes faculty with PhD from 1955 to 2006.
